# Supplementary material for: TLR4 maintains Treg-mediated protection against adverse outcomes in a model of hepatic surgical stress
Source: JCI journal article supplement (doi:10.1172/jci194607), 2026-03-02
Supplement: sd1 [file 1]

1  
2

### Supplemental figures and tables

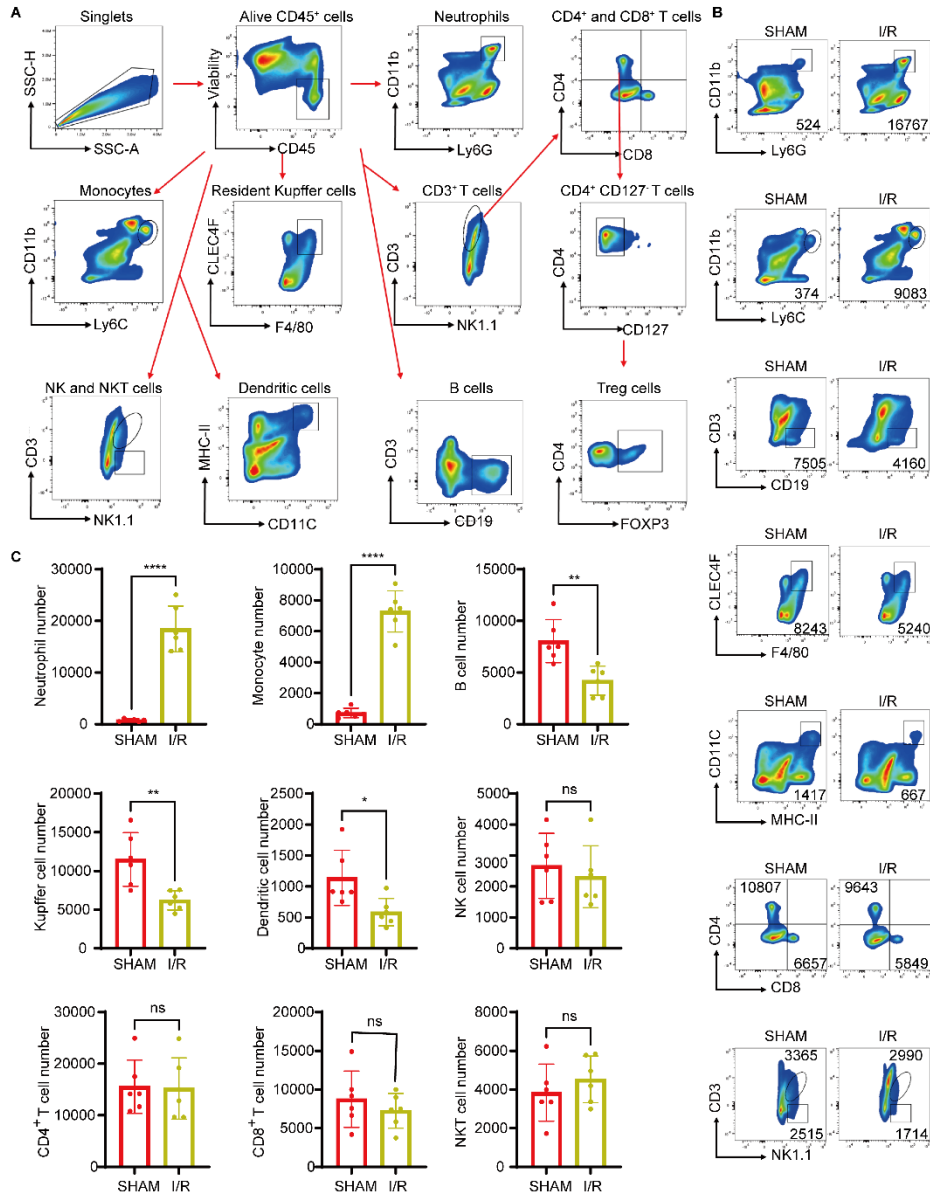

3  
4  
5  
6  
7  
8  
9  
10

**Supplemental Figure 1. Quantification of hepatic immune cells from sham and I/R WT mice. (A)** Gating strategy for the identification of hepatic CD45<sup>+</sup> immune cell populations by flow cytometry in sham and I/R WT mice. **(B-C)** Representative FACS plots and absolute counts of neutrophils, monocytes, dendritic cells, B cells, resident Kupffer cells, CD4<sup>+</sup> T cells, CD8<sup>+</sup> T cells, NK cells, and NKT cells per 1,000,000 hepatic non-parenchymal cells in sham and I/R WT mice (n=6 per group). Statistical analyses were performed using unpaired, two-tailed t-tests **(C)**. \*p < 0.05, \*\*p < 0.01, \*\*\*p < 0.001; \*\*\*\*p < 0.0001; ns, no significant. I/R: ischemia/reperfusion.

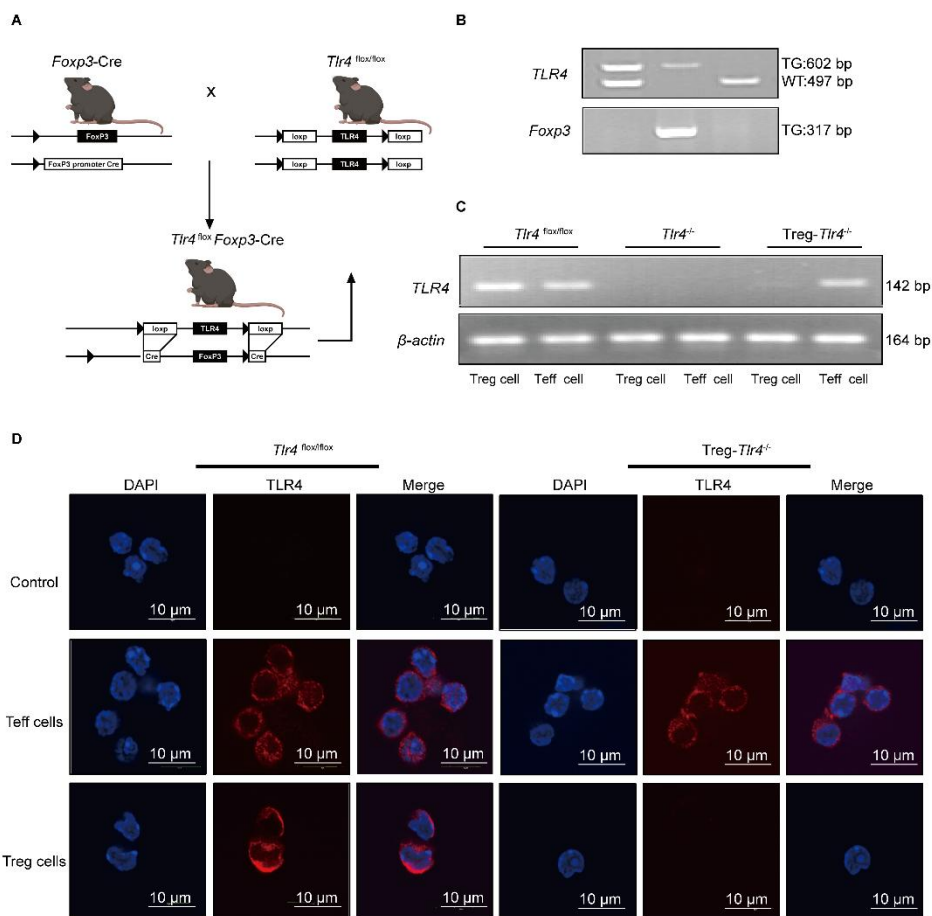

11  
 12  
 13  
 14  
 15  
 16  
 17  
 18  
 19  
 20  
 21

**Supplemental Figure 2. Generation and identification of Treg-*Tlr4*<sup>-/-</sup> mice.** (A) Schematic diagram illustrating the generation of Treg-*Tlr4*<sup>-/-</sup> mice. (B) PCR-based identification of DNA expression for *loxP*-flanked *TLR4* alleles and *Cre* recombinase expression to distinguish heterozygous *Tlr4*<sup>flx/flx</sup> mice, homozygous *Tlr4*<sup>flx/flx</sup> mice, and Treg-*Tlr4*<sup>-/-</sup> mice. (C) PCR-based analysis of *Tlr4* gene expression in Teffs and Tregs isolated from *Tlr4*<sup>flx/flx</sup> mice, *Tlr4*<sup>-/-</sup> mice, and Treg-*Tlr4*<sup>-/-</sup> mice. (D) Representative immunofluorescence images showing TLR4 expression (red) in Teffs and Tregs isolated from *Tlr4*<sup>flx/flx</sup> mice (left panel) and Treg-*Tlr4*<sup>-/-</sup> mice (right panel) through magnetic bead sorting. Scale bars, 10  $\mu$ m. Tregs: regulatory T cells; Teffs: effector T cells.

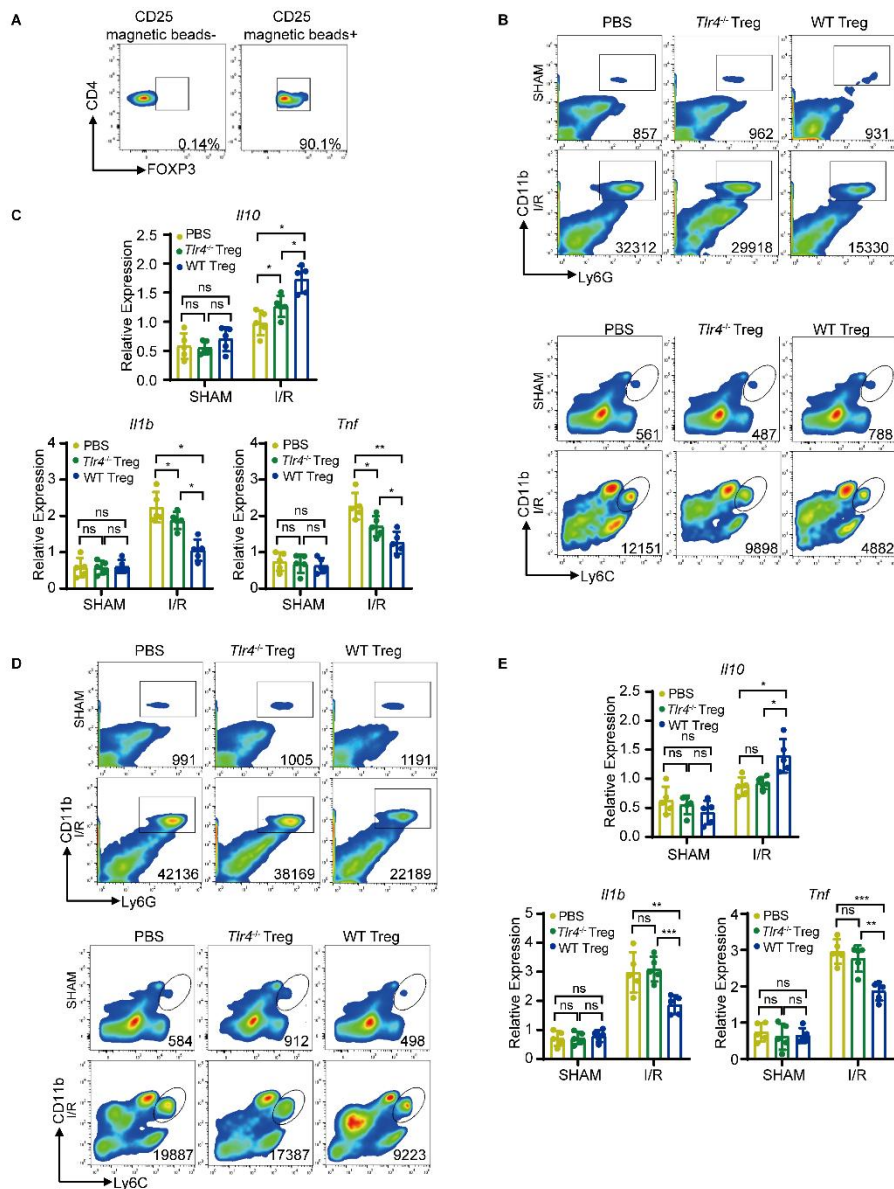

22

23 **Supplemental Figure 3. *Tlr4* expression in Tregs alleviates liver I/R injury in Treg-depleted mice.** (A)

24 Representative flow cytometry plots showing the proportion of CD4<sup>+</sup>FOXP3<sup>+</sup> Tregs in isolated Treg cells and control

25 using MACS-sorting. (B) Representative flow cytometry plots of CD11b<sup>+</sup>Ly6G<sup>+</sup> neutrophils and CD11b<sup>+</sup>Ly6C<sup>+</sup>

26 monocytes in Treg-depleted *Foxp3* DTR mice administered PBS, *Tlr4*<sup>-/-</sup> Tregs, or WT Tregs before and after liver I/R

27 (n=5 per group). (C) Quantitative PCR analysis of *Il1b*, *Tnf*, and *Il10* mRNA expression in ischemic liver from Treg-

28 depleted *Foxp3* DTR mice administered PBS, *Tlr4*<sup>-/-</sup> Tregs, or WT Tregs before and after liver I/R (n=5 per group). (D)

29 Representative flow cytometry plots of CD11b<sup>+</sup>Ly6G<sup>+</sup> neutrophils and CD11b<sup>+</sup>Ly6C<sup>+</sup> monocytes in Treg-depleted WT

30 mice through anti-CD25 antibody and then administered PBS, *Tlr4*<sup>-/-</sup> Tregs, or WT Tregs before and after liver I/R (n=5

31 per group). (E) Quantitative PCR analysis of *Il1b*, *Tnf*, and *Il10* mRNA expression in ischemic liver from Treg-depleted

32 WT mice adoptively transferred with PBS, *Tlr4*<sup>-/-</sup> Tregs, or WT Tregs after I/R (n=5 per group). Statistical analyses were

33 performed using one-way ANOVA with Tukey's post test (C and E). I/R: ischemia/reperfusion.

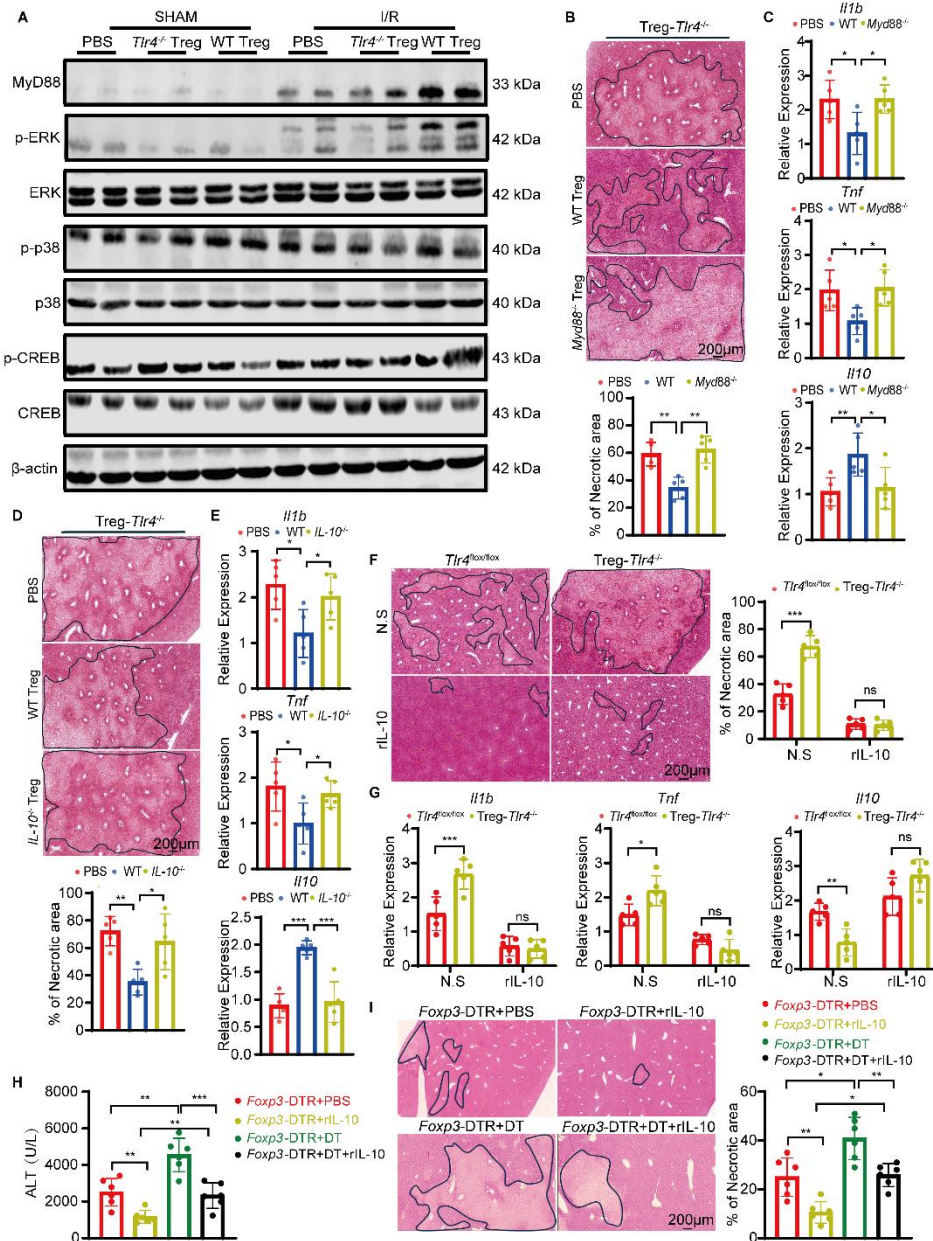

34  
35

36 **Supplemental Figure 4. TLR4/MyD88/ERK/CREB-mediated IL-10 production in Tregs alleviates liver I/R injury.**  
 37 (A) Western blot analysis of MyD88, p-ERK, p-p38, and p-CREB protein expression levels in Tregs from Treg-*Tlr4*<sup>-/-</sup>  
 38 mice adoptively transferred with PBS, *Tlr4*<sup>-/-</sup> Tregs or WT Tregs before and after I/R. (B) Representative H&E staining  
 39 images of ischemia liver from Treg-*Tlr4*<sup>-/-</sup> mice adoptively transferred with PBS, *Myd88*<sup>-/-</sup> Tregs or WT Tregs after liver  
 40 I/R (n=5 per group). (C) Quantitative PCR analysis of *Il1b*, *Tnf*, and *Il10* mRNA expression in ischemia liver from Treg-  
 41 *Tlr4*<sup>-/-</sup> mice adoptively transferred with PBS, *Myd88*<sup>-/-</sup> Tregs or WT Tregs after liver I/R (n=5 per group). (D)  
 42 Representative H&E staining images of ischemia liver from Treg-*Tlr4*<sup>-/-</sup> mice adoptively transferred with PBS, *IL-10*<sup>-/-</sup>  
 43 Tregs or WT Tregs after liver I/R (n=5 per group). (E) Quantitative PCR analysis of *Il1b*, *Tnf*, and *Il10* mRNA expression  
 44 in ischemia liver from Treg-*Tlr4*<sup>-/-</sup> mice adoptively transferred with PBS, *IL-10*<sup>-/-</sup> Tregs or WT Tregs after liver I/R (n=5  
 45 per group). (F) Representative H&E staining images of ischemia liver lobe from *Tlr4*<sup>lox/lox</sup> mice and Treg-*Tlr4*<sup>-/-</sup> mice  
 46 administered recombinant IL-10 or its control after I/R (n=5 per group). (G) Quantitative PCR analysis of *Il1b*, *Tnf*, and  
 47 *Il10* mRNA expression in ischemia liver from *Tlr4*<sup>lox/lox</sup> mice and Treg-*Tlr4*<sup>-/-</sup> mice administered recombinant IL-10 or its  
 48 control after I/R (n=5 per group). (H) Serum ALT levels in I/R *Foxp3-DTR* mice following Treg depletion or not, and  
 49 treatment with recombinant IL-10 or vehicle (n=6 per group). (I) Representative H&E staining images of ischemia liver  
 50 from these mice (n=6 per group); Scale bars, 200 μm. Statistical analyses were performed using one-way ANOVA with  
 51 Tukey's post test (B-E), two-way ANOVA with Sidak's post-test (F-G) and one-way ANOVA (H-I). \*p < 0.05, \*\*p < 0.01,  
 52 \*\*\*p < 0.001; ns, not significant; ALT: Alanine aminotransferase; AST: Aspartate aminotransferase; I/R:  
 53 ischemia/reperfusion; rIL-10: recombinant IL-10.

54 **Supplemental Table 1. Preoperative and Postoperative clinical**  
55 **characteristics of patients with hepatic hemangioma (p values were**  
56 **determined using ANOVA test)**

|                                          | <b>No hepatic<br/>portal block<br/>(N=6)</b> | <b>Hepatic<br/>portal block<br/>(&lt;8.4min)<br/>(N=5)</b> | <b>Hepatic portal<br/>Block<br/>(&gt;8.4min)<br/>(N=5)</b> | <b>p-value</b> |
|------------------------------------------|----------------------------------------------|------------------------------------------------------------|------------------------------------------------------------|----------------|
| <b>Preoperative</b>                      |                                              |                                                            |                                                            |                |
| Age – median<br>(IQR)                    | 49.5 (39-62)                                 | 48 (36-57)                                                 | 50.2 (41-63)                                               | 0.92           |
| Female gender<br>– n (%)                 | 3 (50%)                                      | 2 (40%)                                                    | 3 (60%)                                                    | 0.72           |
| Hypertension–<br>n (%)                   | 0(0%)                                        | 0(0%)                                                      | 1(20%)                                                     | 0.46           |
| Hyperlipidemia–<br>n (%)                 | 0(0%)                                        | 1(20%)                                                     | 0 (0%)                                                     | 0.46           |
| Body mass<br>index – median<br>(IQR)     | 23.30 (19.92-<br>30.67)                      | 23.2 (19.31-<br>24.8)                                      | 24.11 (21.65-<br>25.39)                                    | 0.43           |
| AST – median<br>(IQR)                    | 19.67 (15-27)                                | 20 (17-22)                                                 | 21(19-25)                                                  | 0.89           |
| ALT – median<br>(IQR)                    | 18.33 (9-28)                                 | 19.1 (8-25)                                                | 17.5 (11-28)                                               | 0.68           |
| Total bilirubin –<br>median (IQR)        | 11.38(5.3-<br>18.8)                          | 13.75<br>(7.2-19.6)                                        | 14.3<br>(9.2-20.5)                                         | 0.17           |
| INR – median<br>(IQR)                    | 1.68(0.87-4.2)                               | 1.70<br>(0.94-3.2)                                         | 1.74<br>(0.98-3.5)                                         | 0.94           |
| Albumin –<br>median (IQR)                | 40.35<br>(36.2-43.1)                         | 41.78<br>(38.9-43.6)                                       | 44.1<br>(41.2-48.6)                                        | 0.17           |
| platelet count–<br>median (IQR)          | 178.5<br>(117-244)<br>*10 <sup>9</sup> /L    | 179<br>(104-225)<br>*10 <sup>9</sup> /L                    | 176.4<br>(111-243)<br>*10 <sup>9</sup> /L                  | 0.93           |
| PT–median<br>(IQR)                       | 12.8<br>(11.7-13.9)                          | 11.85<br>(12.9-15.1)                                       | 11.85<br>(13-14.8)                                         | 0.57           |
| APTT–median<br>(IQR)                     | 39.82<br>(29.9-42.9)                         | 39.9<br>(33.1-40.8)                                        | 38.28<br>(32.5-41.4)                                       | 0.26           |
| Hepatic pedicle<br>block–median<br>(IQR) | 0(0) min                                     | 3.6<br>(1-8.4) min                                         | 10.2<br>(8.4-15) min                                       | <0.01          |
| <b>Postoperative</b>                     |                                              |                                                            |                                                            |                |

|                                   |                                         |                                        |                                         |       |
|-----------------------------------|-----------------------------------------|----------------------------------------|-----------------------------------------|-------|
| AST – median<br>(IQR)             | 327.5<br>(91-655)                       | 471.8<br>(268-694)                     | 1015.6<br>(830-1284)                    | 0.002 |
| ALT – median<br>(IQR)             | 323.67<br>(73-705)                      | 597.2<br>(196-746)                     | 1250<br>(933-1910)                      | 0.005 |
| Total bilirubin –<br>median (IQR) | 16.75(7.7-26)                           | 18.36 (11-<br>28.7)                    | 21.7 (11.7-26)                          | 0.47  |
| INR – median<br>(IQR)             | 1.58<br>(0.97-3.2)                      | 1.77<br>(0.89-3.42)                    | 1.84<br>(0.86-3.98)                     | 0.06  |
| Albumin –<br>median (IQR)         | 34.45<br>(30.7-38)                      | 37.26<br>(22.1-39.6)                   | 35.71<br>(25.1-40.6)                    | 0.85  |
| platelet count–<br>median (IQR)   | 191<br>(102-261)<br>*10 <sup>9</sup> /L | 183<br>(89-277)<br>*10 <sup>9</sup> /L | 195<br>(121-281)<br>*10 <sup>9</sup> /L | 0.71  |
| PT–median<br>(IQR)                | 13.1<br>(12.4-16.2)                     | 16.5<br>(14.9-18.5)                    | 19.5<br>(17.7-20.5)                     | 0.04  |
| APTT–median<br>(IQR)              | 39.97<br>(29.9-41.9)                    | 38.28<br>(32.5-38.4)                   | 41.1<br>(38.5-43.4)                     | 0.14  |

57

58

59

60

61

62

63

64

65

66

67

68

69

70

71

72

73

74

75

76

77

78

79

80

81

82

83 **Supplemental Table 2. Antibodies**

| <b>Name</b>                        | <b>Supplier</b> | <b>Cat no.</b> | <b>Clone no.</b> |
|------------------------------------|-----------------|----------------|------------------|
| anti-CD45-FITC                     | BioLegend       | 103108         | 103108           |
| anti-CD11b- Brilliant Violet 421™  | BioLegend       | 101251         | M1/70            |
| anti-F4/80 Spark YG™ 593           | BioLegend       | 101251         | QA17A29          |
| anti-CLEC4F Alexa Fluor® 647       | BioLegend       | 156804         | 3E3F9            |
| anti-CD19 BUV563                   | BD Biosciences  | 749028         | 1D3              |
| anti-Ly6G- Alexa Fluor® 700        | BioLegend       | 127622         | 1A8              |
| anti-Ly6C- Brilliant Violet 510™   | BioLegend       | 128033         | HK1.4            |
| anti-NK1.1- Brilliant Violet 570™  | BioLegend       | 108733         | PK136            |
| anti-CD8a BUV496                   | BD Biosciences  | 750024         | 53-6.7           |
| anti-CD4- BUV615                   | BD Biosciences  | 613006         | GK1.5            |
| anti-CD3-BUV661                    | BD Biosciences  | 741562         | 17A2             |
| anti-CD11c Brilliant Violet 650™   | BioLegend       | 117339         | N418             |
| anti-I-A/I-E Brilliant Violet 711™ | BioLegend       | 107643         | M5/114.15.2      |
| anti-IL-10- Brilliant Violet 421™  | BioLegend       | 505021         | JES5-16E3        |
| anti-CD127- PE-cy7                 | eBioscience™    | 25-1271-82     | A7R34            |
| anti-mouse FOXP3-PE                | BioLegend       | 126404         | MF-14            |
| anti-mouse FOXP3-APC               | eBioscience     | 17-5773-82     | FJK-16s          |
| anti-TLR1-BV510                    | BD Biosciences  | 743134         | TR23             |
| anti-TLR2- PE/Cyanine7             | BioLegend       | 153012         | QA16A01          |
| anti-TLR3- Alexa Fluor® 700        | Novus           | NBP227405      | 27N3D4           |
| anti-TLR4- BV786                   | BD Biosciences  | 741015         | MTS510           |
| anti-TLR5- Alexa Fluor® 647        | BioLegend       | 148104         | ACT5             |
| anti-TLR6- BV650                   | BD Biosciences  | 743269         | C1N2             |
| anti-TLR7- PE/Cy5.5                | Novus           | N104349PEC5    | 4F4              |
| anti-TLR8                          | Novus           | DDX0481P100    | 307D3.01         |
| anti-TLR9- PerCP                   | Novus           | NB371746       | 26C593R          |
| anti-TLR11-mFluor Violet 450       | Novus           | NB346482       | 786404           |
| Anti-FOXP3 antibody                | Abclonal        | A5760          | Polyclonal       |
| anti-TLR4 antibody                 | eBioscience™    | HTA125         | 14991782         |
| Cy3-conjugated anti-mouse          | Beyotime        | Polyclonal     | A0521            |
| Cy5-conjugated anti-mouse          | Sigma           | Polyclonal     | AC111S           |
| anti-mouse CD25 antibody           | Bio X cell      | PC61           | BE0012           |
| anti-mouse CD16/32 Antibody        | BioLegend       | 93             | 101302           |
| Recombinant Mouse IL-10            | R&D             | 417-ML-025/CF  | /                |
| Anti-MyD88 antibody                | Abcam           | ab2064         | Polyclonal       |
| Phospho-ERK1/2 antibody            | Abclonal        | AP0472         | Polyclonal       |
| ERK1/2 antibody                    | Abclonal        | A16686         | Polyclonal       |
| Phospho-p38 MAPK-antibody          | Abclonal        | AP0526         | Polyclonal       |
| p38 MAPK-antibody                  | Abclonal        | A5049          | Polyclonal       |

|                         |                           |        |            |
|-------------------------|---------------------------|--------|------------|
| Phosph- CREB antibody   | Abclonal                  | AP0019 | Polyclona  |
| CREB antibody           | Abclonal                  | A10826 | Polyclonal |
| $\beta$ -actin antibody | Cell Signaling Technology | 4970   | Polyclonal |

84  
85  
86  
87

**Supplemental Table 3. Primers for genotyping and RT-qPCR (mouse)**

| <b>Name</b>                                | <b>Sequence</b>              | <b>Supplier</b> |
|--------------------------------------------|------------------------------|-----------------|
| <i>Tlr4</i> <sup>flox/flox</sup> forward A | AGGGAGATGTGTGTGAAGAAG CC     | Sangon Biotech  |
| <i>Tlr4</i> <sup>flox/flox</sup> reverse B | TGACTTTCTCAGTTTGGTCCTGG      | Sangon Biotech  |
| <i>Tlr4</i> <sup>flox/flox</sup> reverse C | TTCCAGCTATGGCCCAGATGAACT     | Sangon Biotech  |
| <i>Foxp3</i> -Cre forward                  | CGGGTCAGAAAGAATGGTGT         | Sangon Biotech  |
| <i>Foxp3</i> -Cre reverse                  | CAGTTTCAGTCCCCATCCTC         | Sangon Biotech  |
| <i>Tlr4</i> forward                        | CAAGAACATAGATCTGAGCTTCAA CCC | Sangon Biotech  |
| <i>Tlr4</i> reverse                        | GCTGTCCAATAGGGAAGCTTTCTAGAG  | Sangon Biotech  |
| <i>Il1b</i> forward                        | GGATGAGGACATGAGCACC          | Sangon Biotech  |
| <i>Il1b</i> reverse                        | GGAGCCTGTAGTGCAGTTGT         | Sangon Biotech  |
| <i>Tnf</i> forward                         | ACTGAACTTCGGGGTGATCG         | Sangon Biotech  |
| <i>Tnf</i> reverse                         | GGCTACAGGCTTGTCACTCG         | Sangon Biotech  |
| <i>Il10</i> forward                        | CCCTTTGCTATGGTGCCTT          | Sangon Biotech  |
| <i>Il10</i> reverse                        | TGGTTTCTCTTCCAAGACC          | Sangon Biotech  |
| <i>Foxp3</i> forward                       | TGACCAAGGCTTCATCTGTG         | Sangon Biotech  |
| <i>Foxp3</i> reverse                       | GAGGAACTCTGGGAATGTGC         | Sangon Biotech  |
| <i>Ikzf2</i> forward                       | CAGCATGCACCAAGCACAAT         | Sangon Biotech  |
| <i>Ikzf2</i> reverse                       | ATGGGGCCATCCATGTTGTT         | Sangon Biotech  |

|                                |                         |                |
|--------------------------------|-------------------------|----------------|
| <i>Ii2ra</i> forward           | GCGTTGCTTAGGAAACTCCTGG  | Sangon Biotech |
| <i>Ii2ra</i> reverse           | GCATAGACTGTGTTGGCTTCTGC | Sangon Biotech |
| <i>Ctla4</i> forward           | CTCAGCTGAACCTGGCTACC    | Sangon Biotech |
| <i>Ctla4</i> reverse           | CCACTTGCAGACACCATTG     | Sangon Biotech |
| <i>Myd88</i> forward           | CATGTTCTCCATACCCTTGGT   | Sangon Biotech |
| <i>Myd88</i> reverse           | AAACTGCGAGTGGGGTCAG     | Sangon Biotech |
| <i>Mapk1</i> forward           | ACCCAAGTGATGAGCCCATTG   | Sangon Biotech |
| <i>Mapk1</i> reverse           | TGCATTGAAAGTGCACACTGC   | Sangon Biotech |
| <i>Creb1</i> forward           | GCTGCCTCTGGAGACGTACAA   | Sangon Biotech |
| <i>Creb1</i> reverse           | GCTAGTGGGTGCTGTGCGA     | Sangon Biotech |
| <i>Mapk14</i> forward          | GCATCGTGTGGCAGTTAAGA    | Sangon Biotech |
| <i>Mapk14</i> reverse          | GTCCTTTTGGCGTGAATGAT    | Sangon Biotech |
| $\beta$ - <i>actin</i> forward | TGTTACCAACTGGGACGACA    | Sangon Biotech |
| $\beta$ - <i>actin</i> reverse | GGGGTGTGAAGGTCTCAA      | Sangon Biotech |

88

89

90

**Supplemental Table 4. Deposited data**

91

| <b>Name of repository</b>                                                                                                         | <b>Identifier</b> | <b>Link</b>                                                                                                               |
|-----------------------------------------------------------------------------------------------------------------------------------|-------------------|---------------------------------------------------------------------------------------------------------------------------|
| Bulk RNA-Seq for murine liver Treg cells before and after liver I/R                                                               | PRJNA1206100      | <a href="https://www.ncbi.nlm.nih.gov/bioproject/PRJNA1206100/">https://www.ncbi.nlm.nih.gov/bioproject/PRJNA1206100/</a> |
| Bulk RNA-Seq for murine liver Treg cells in <i>Tlr4</i> <sup>flox/flox</sup> and Treg- <i>Tlr4</i> <sup>-/-</sup> after liver I/R | PRJNA1206185      | <a href="https://www.ncbi.nlm.nih.gov/bioproject/PRJNA1206185/">https://www.ncbi.nlm.nih.gov/bioproject/PRJNA1206185/</a> |

92
